# Supplementary material for: Near-Infrared Imaging of Steroid Hormone Activities Using Bright BRET Templates
Source: MDPI journal article supplement (doi:10.3390/ijms24010677), 2022-12-30
Supplement: s1 [file s1]

# Suppl. Fig S1

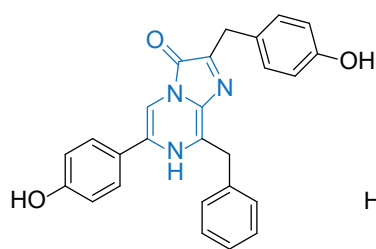

native Coelenterazine  
(nCTZ)

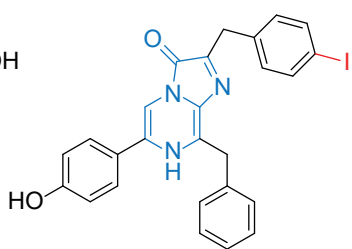

Coelenterazine i  
(CTZi)

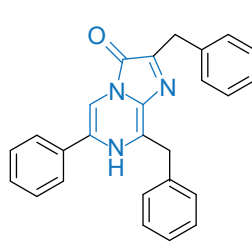

DeepBlueC  
(BBlueC)

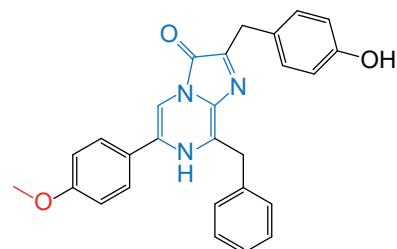

6-ome-CTZ  
(Ome)

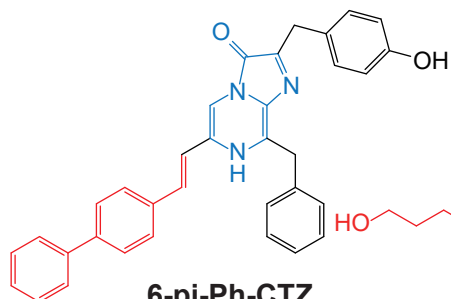

6-pi-Ph-CTZ  
(piPH)

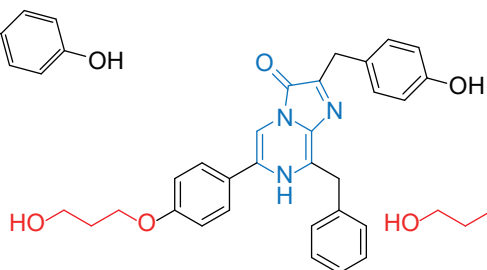

BBlue1.2  
(AI3OH)

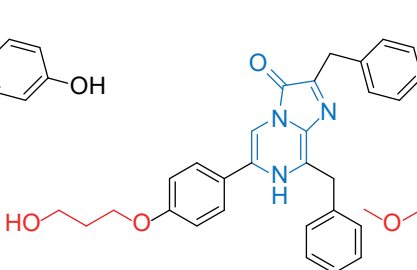

BBlue1.6  
(3OH2H)

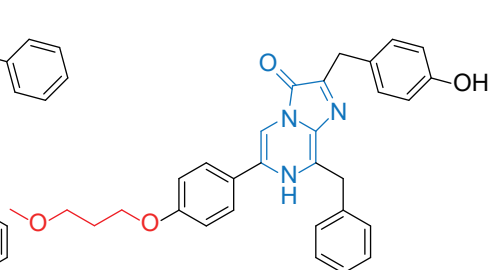

BBlue2.1  
(AI3OMe)

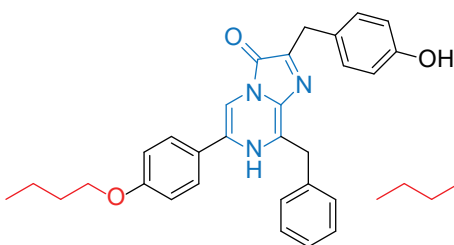

BBlue2.2  
(AI3)

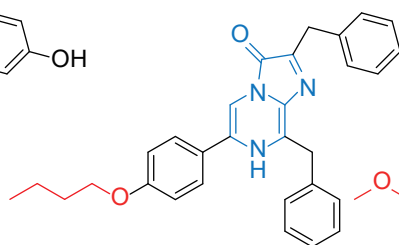

BBlue2.4  
(AI32H)

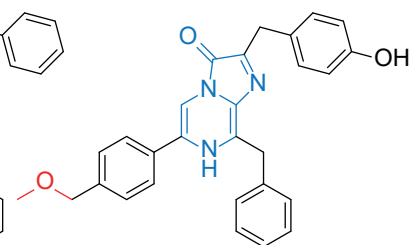

BBlue3.1  
(Ether)

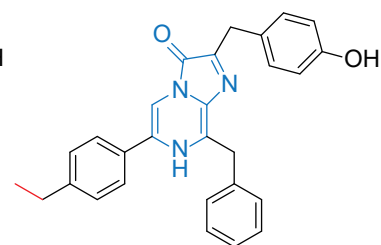

BBlue3.2  
(Ethyl)

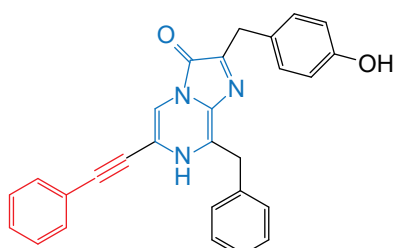

6-etH-CTZ  
(6etCTZ)

Blue: imidazopyrazinone backbone

Live cells

CBLuc Red

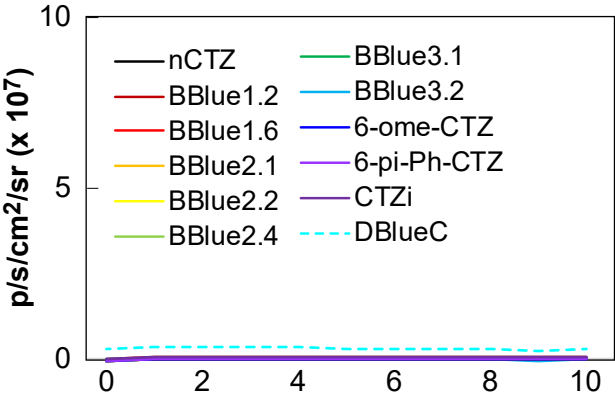

NLuc

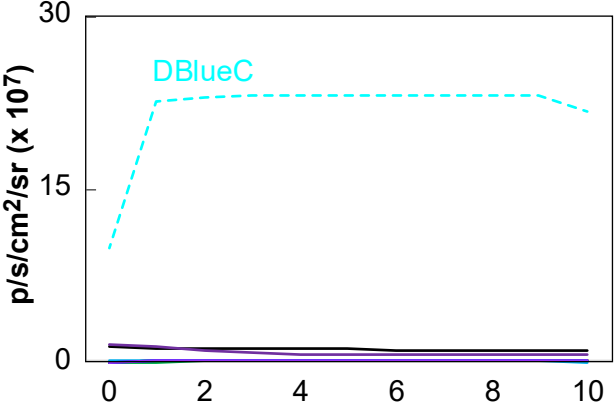

ALuc16

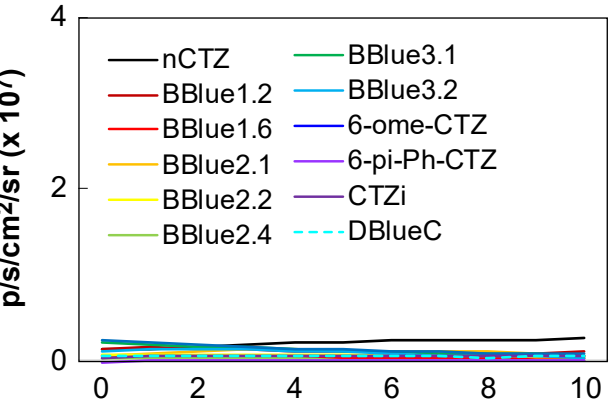

ALuc47

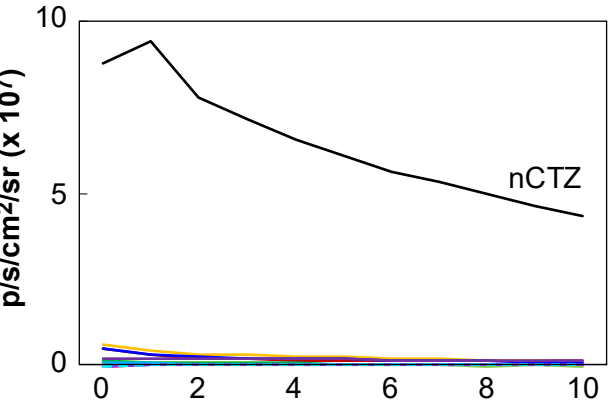

Lysates

CBLuc Red

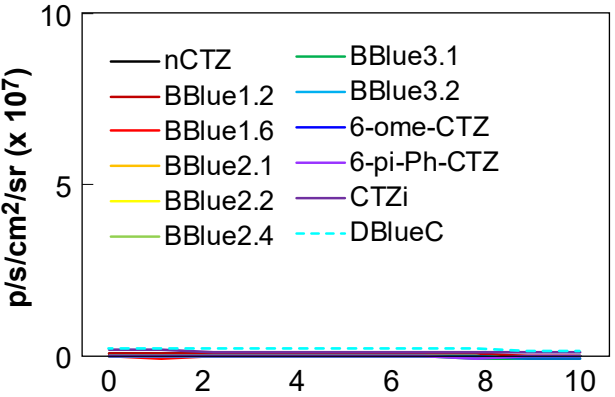

NLuc

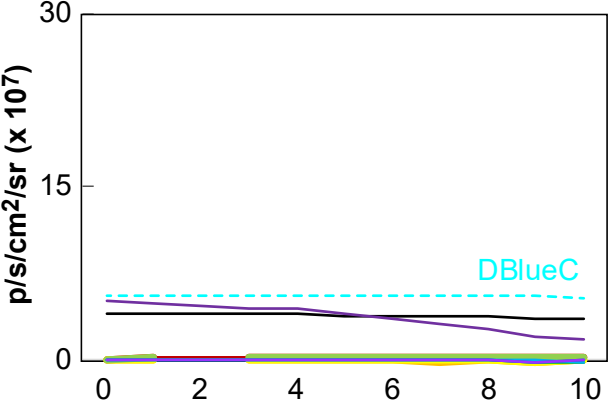

ALuc16

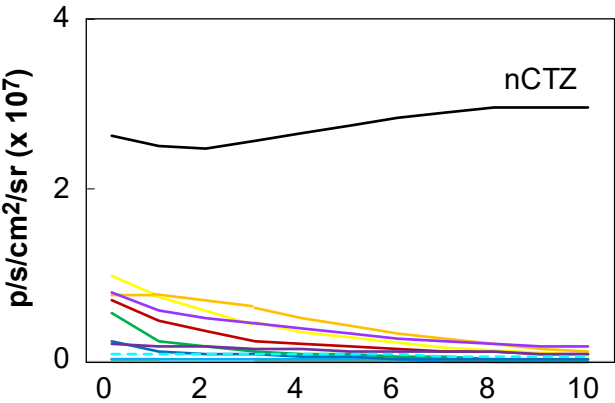

ALuc47

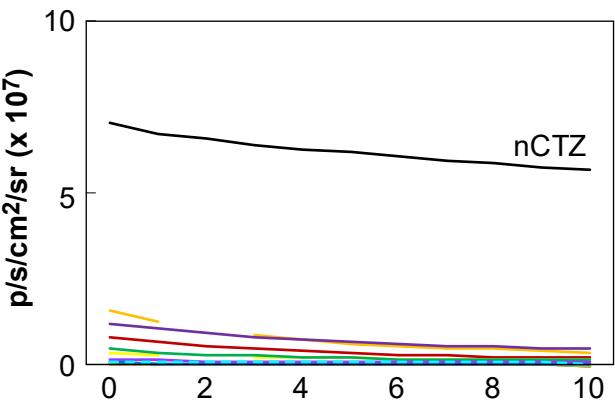

***Suppl. Fig S3***

(A) Optical Image of Autoluminescence

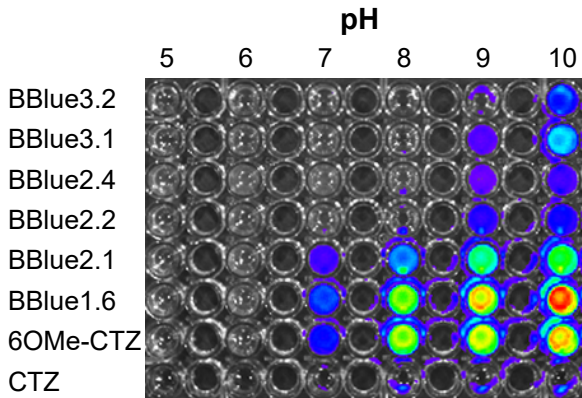

(B) pH dependancy of Autoluminescence

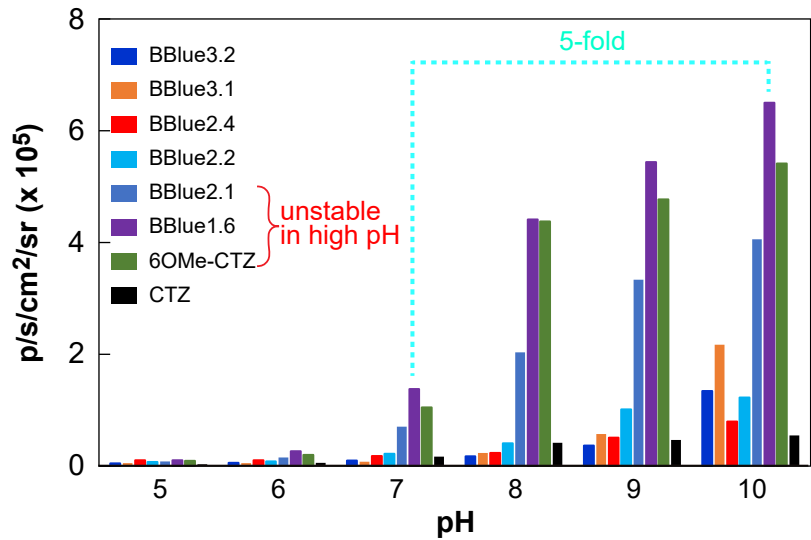

Suppl. Fig S4

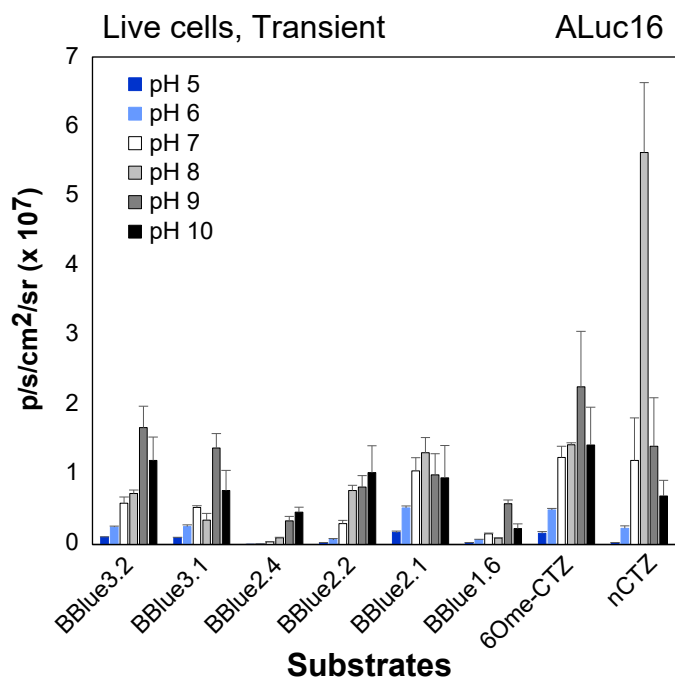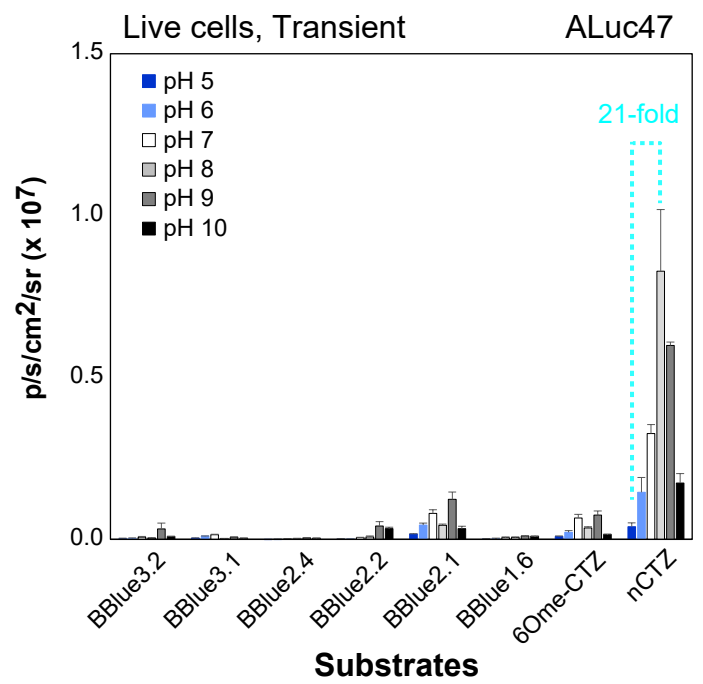

Suppl. Fig S5

(A) AR probe, Live COS-7 cells

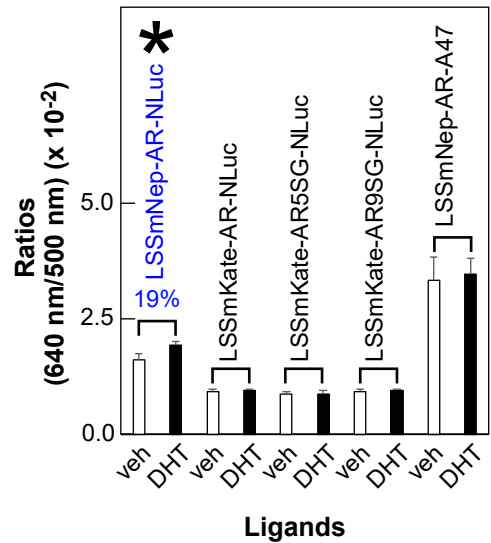

(C) GR probe, Live COS-7 cells

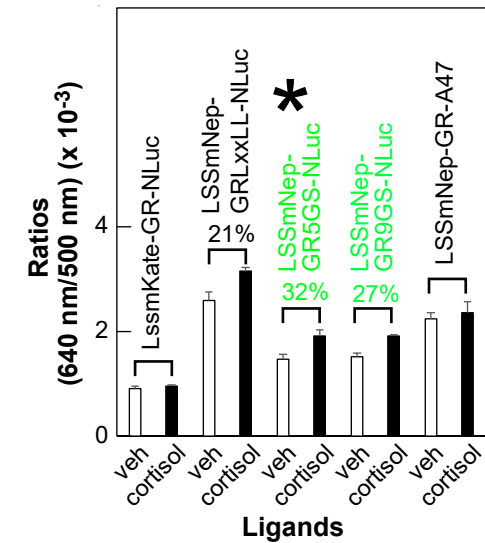

(E) ER probe, Live COS-7 cells

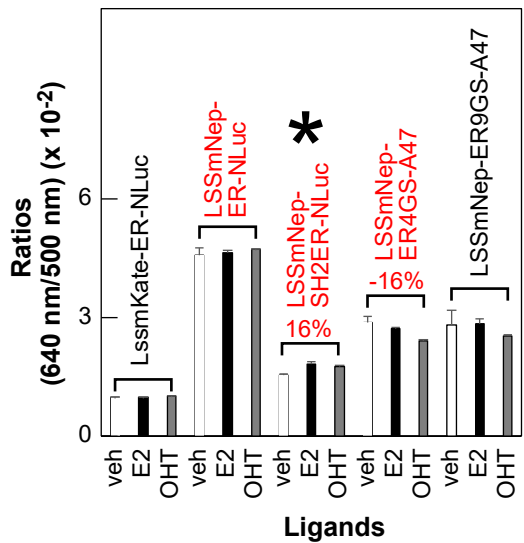

(B) AR probe, Lysate

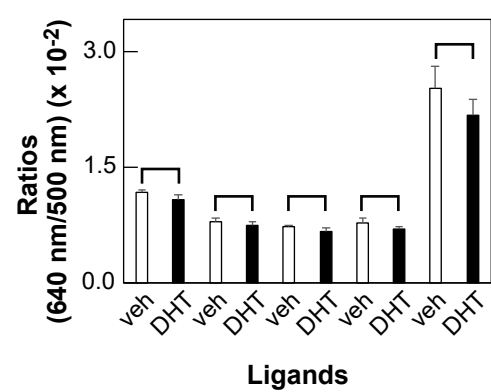

(D) GR probe, Lysate

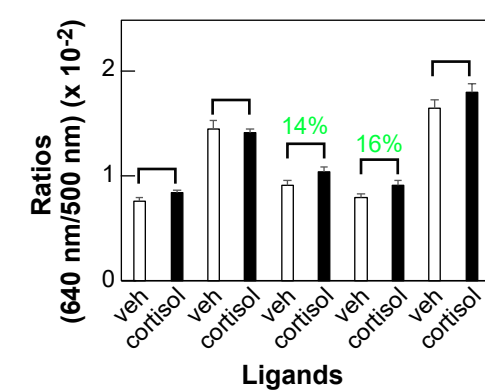

(F) ER probe, Lysate

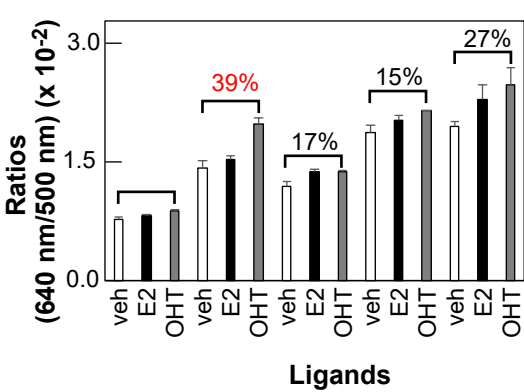

Suppl. Fig. S6

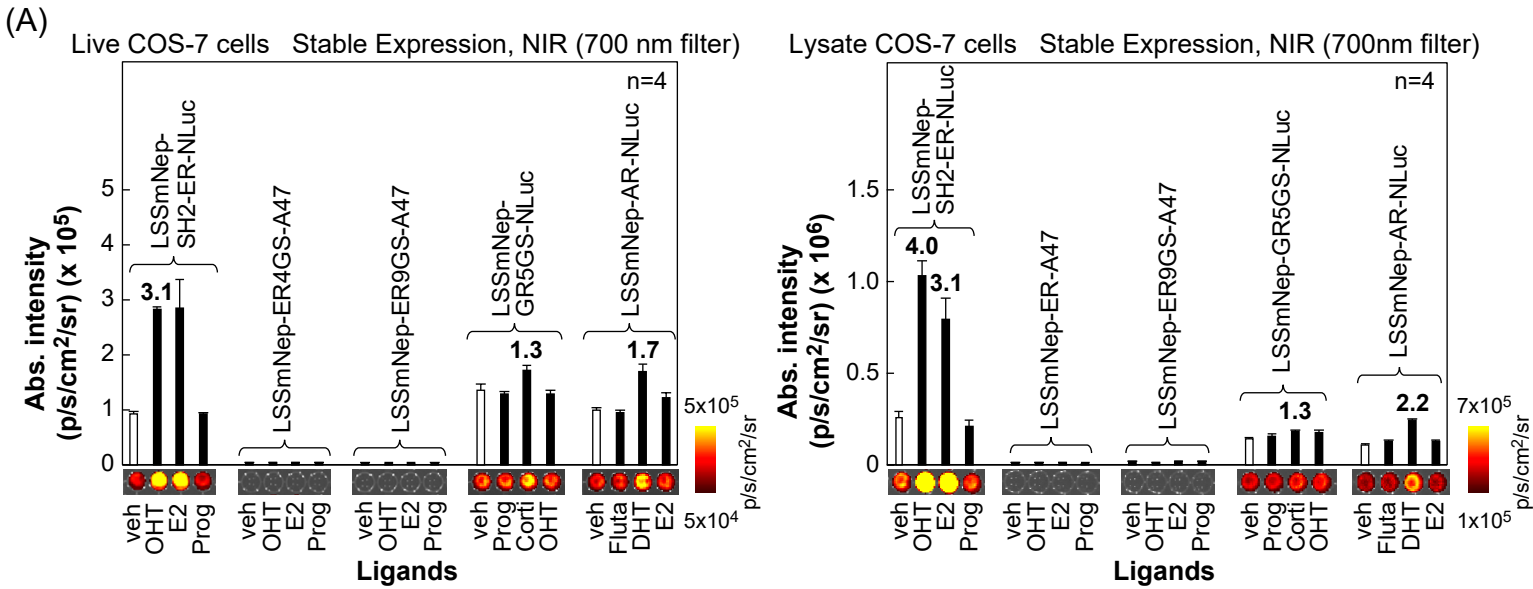

(B) Chemical structures of ligands

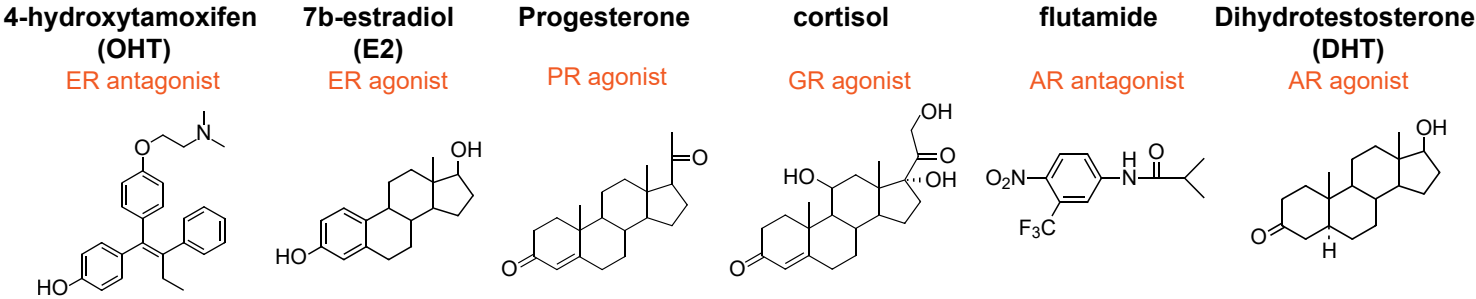

Supple. Table S1

|                                 |        | $\lambda_{\text{max}}$ (RLU) | Peak (nm) | Area > 600 nm (%) |
|---------------------------------|--------|------------------------------|-----------|-------------------|
| native Coelenterazine<br>(nCTZ) | NLuc   | 667743                       | 465       | 1.8               |
|                                 | ALuc16 | 521857                       | 494       | 4.8               |
|                                 | ALuc47 | 1351490                      | 489       | 1.3               |
| DeepBlueC<br>(DBlueC)           | NLuc   | 1108213                      | 458       | 0.6               |
|                                 | ALuc16 | 10624                        | -         | -                 |
|                                 | ALuc47 | 10007                        | -         | -                 |
| 6-etH-CTZ<br>(6etCTZ)           | NLuc   | 12413                        | -         | -                 |
|                                 | ALuc16 | 138140                       | 490       | 6.6               |
|                                 | ALuc47 | 23120                        | 487       | -                 |
| 6-pi-Ph-CTZ<br>(piPh)           | NLuc   | 11423                        | -         | -                 |
|                                 | ALuc16 | 14249                        | -         | -                 |
|                                 | ALuc47 | 12584                        | -         | -                 |
| BBlue1.2<br>(Al3OH)             | NLuc   | 10936                        | -         | -                 |
|                                 | ALuc16 | 226945                       | 498       | 4.9               |
|                                 | ALuc47 | 115463                       | 490       | 8.9               |
| BBlue1.6<br>(3OH2H)             | NLuc   | 31216                        | 453       | -                 |
|                                 | ALuc16 | 10549                        | -         | -                 |
|                                 | ALuc47 | 12333                        | -         | -                 |
| BBlue2.1<br>(Al3OMe)            | NLuc   | 11018                        | -         | -                 |
|                                 | ALuc16 | 143076                       | 490       | 6.9               |
|                                 | ALuc47 | 238449                       | 490       | 6.0               |
| BBLue2.2<br>(Al3)               | NLuc   | 10838                        | -         | -                 |
|                                 | ALuc16 | 120853                       | 490       | 6.9               |
|                                 | ALuc47 | 57104                        | 490       | 12.9              |
| BBlu2.4<br>(Al32H)              | NLuc   | 28608                        | 447       | -                 |
|                                 | ALuc16 | 10727                        | -         | -                 |
|                                 | ALuc47 | 11881                        | -         | -                 |
| BBlue3.1<br>(Ether)             | NLuc   | 14038                        | -         | -                 |
|                                 | ALuc16 | 80714                        | 494       | 10.5              |
|                                 | ALuc47 | 13142                        | -         | -                 |
| 6-ome-CTZ<br>(Ome)              | NLuc   | 13128                        | -         | -                 |
|                                 | ALuc16 | 214279                       | 498       | 5.5               |
|                                 | ALuc47 | 81956                        | 490       | 9.2               |
